# Supplementary material for: Untargeted and Targeted Metabolomic Profiling of Australian Indigenous Fruits
Source: PubMed Central journal article supplement (PMC7143387; doi:10.3390/metabo10030114), 2020-03-19
Supplement: metabolites-10-00114-s001.pdf [file metabolites-10-00114-s001.pdf]

## Supplementary Materials

**Table S1.** Targeted analysis of 18 minerals and heavy metals from Davidson's plum (DP), finger lime (FL) and native pepperberry (NP). Results are expressed as mean values (mg/DWkg)  $\pm$  SD (n=3). Superscript letters within each column indicate statistically significant ( $p < 0.05$ ; Tukey test).

| Sample | Al                              | As                             | Ca                                | Cd                            | Co                            | Cr                            | Cu                             | Fe                             | K                                  | Mg                               | Mn                               | Mo                            | Na                               | Ni                            | P                                | Pb                             | S                                 | Zn                             |
|--------|---------------------------------|--------------------------------|-----------------------------------|-------------------------------|-------------------------------|-------------------------------|--------------------------------|--------------------------------|------------------------------------|----------------------------------|----------------------------------|-------------------------------|----------------------------------|-------------------------------|----------------------------------|--------------------------------|-----------------------------------|--------------------------------|
| DP     | 114.2 $\pm$<br>1.2 <sup>a</sup> | 9.0 $\pm$<br>4.9 <sup>a</sup>  | 563.3 $\pm$<br>15.2 <sup>c</sup>  | 4.4 $\pm$<br>0.5 <sup>a</sup> | 1.8 $\pm$<br>1.4 <sup>a</sup> | 1.3 $\pm$<br>0.8 <sup>a</sup> | 9.0 $\pm$<br>0.1 <sup>a</sup>  | 16.3 $\pm$<br>1.7 <sup>b</sup> | 6877.6 $\pm$<br>138.0 <sup>a</sup> | 816.1 $\pm$<br>7.4 <sup>a</sup>  | 155.5 $\pm$<br>3.4 <sup>a</sup>  | 0.0 $\pm$<br>0.0 <sup>a</sup> | 102.0 $\pm$<br>23.8 <sup>b</sup> | 1.5 $\pm$<br>0.6 <sup>a</sup> | 462.5 $\pm$<br>7.6 <sup>b</sup>  | 1.0 $\pm$<br>0.1 <sup>a</sup>  | 941.3 $\pm$<br>15.8 <sup>a</sup>  | 2.8 $\pm$<br>0.7 <sup>b</sup>  |
| FP     | 7.2 $\pm$<br>1.7 <sup>c</sup>   | 18.7 $\pm$<br>6.9 <sup>a</sup> | 1390.2 $\pm$<br>35.8 <sup>a</sup> | 1.7 $\pm$<br>2.8 <sup>a</sup> | 1.5 $\pm$<br>0.6 <sup>a</sup> | 1.2 $\pm$<br>0.8 <sup>a</sup> | 8.3 $\pm$<br>0.5 <sup>a</sup>  | 12.4 $\pm$<br>1.0 <sup>b</sup> | 6697.4 $\pm$<br>98.7 <sup>a</sup>  | 577.0 $\pm$<br>5.4 <sup>c</sup>  | 2.6 $\pm$<br>0.2 <sup>c</sup>    | 1.3 $\pm$<br>2.3 <sup>a</sup> | 113.0 $\pm$<br>1.4 <sup>b</sup>  | 0.0 $\pm$<br>0.0 <sup>a</sup> | 870.6 $\pm$<br>24.2 <sup>a</sup> | 1.4 $\pm$<br>0.7 <sup>a</sup>  | 857.0 $\pm$<br>78.4 <sup>a</sup>  | 3.8 $\pm$<br>1.0 <sup>b</sup>  |
| NP     | 57.3 $\pm$<br>5.6 <sup>b</sup>  | 15.5 $\pm$<br>9.2 <sup>a</sup> | 788.3 $\pm$<br>37.3 <sup>b</sup>  | 1.1 $\pm$<br>0.2 <sup>a</sup> | 2.6 $\pm$<br>0.7 <sup>a</sup> | 1.2 $\pm$<br>0.2 <sup>a</sup> | 11.4 $\pm$<br>4.5 <sup>a</sup> | 54.1 $\pm$<br>9.1 <sup>a</sup> | 4623.5 $\pm$<br>152.7 <sup>b</sup> | 723.9 $\pm$<br>23.9 <sup>b</sup> | 266.0 $\pm$<br>13.0 <sup>b</sup> | 0.0 $\pm$<br>0.0 <sup>a</sup> | 176.0 $\pm$<br>6.6 <sup>a</sup>  | 1.5 $\pm$<br>0.6 <sup>a</sup> | 835.3 $\pm$<br>49.2 <sup>a</sup> | 0.1 $\pm$<br>0.02 <sup>a</sup> | 1311.9 $\pm$<br>87.4 <sup>a</sup> | 32.5 $\pm$<br>0.6 <sup>a</sup> |

**Table S2.** GC  $\times$  GC-TOF-MS parameters for comprehensive profiling of fruit samples.

| <b>Autosampler settings</b>                        |                                                   |
|----------------------------------------------------|---------------------------------------------------|
| Incubator and agitator                             | On                                                |
| Incubator temperature                              | 80 °C                                             |
| Fill speed                                         | 50 $\mu$ L/s                                      |
| Injection speed                                    | 100 $\mu$ L/s                                     |
| Injection volume                                   | 1.5 mL                                            |
| Syringe temperature                                | 80 °C                                             |
| <b>GC <math>\times</math> GC-TOF-MS conditions</b> |                                                   |
| Injection mode                                     | Splitless                                         |
| Injector temperature                               | 250 °C                                            |
| Carrier gas                                        | Helium (99.9999%)                                 |
| Flow rate                                          | 1 mL/min                                          |
| Primary column                                     | Agilent DB-624UI (midpolar)                       |
| Primary column composition                         | 6% cyanonpropyl phenyl, 94% polydimethyl siloxane |
| Primary column length                              | 30 m $\times$ 250 $\mu$ m $\times$ 1.4 $\mu$ m    |
| Secondary column                                   | Restek Stabilwax (polar)                          |

|                                                                |                                    |
|----------------------------------------------------------------|------------------------------------|
| Secondary column composition                                   | crossbond polyethylene glycol      |
| Secondary column length                                        | 0.9 m x 250 $\mu$ m x 0.50 $\mu$ m |
| Secondary column temperature                                   | 15 $^{\circ}$ C offset primary     |
| Modulator temperature                                          | 25 $^{\circ}$ C offset primary     |
| Modulation                                                     | 2.5 s                              |
| Hot pulse time                                                 | 0.4 s                              |
| Cool time                                                      | 0.85 s                             |
| Transfer line                                                  | 240 $^{\circ}$ C                   |
| MS voltage                                                     | 1700 V                             |
| Electron energy                                                | 70 V                               |
| Scan rate                                                      | 200 spectra/s                      |
| Mass range                                                     | 35-500 <i>m/z</i>                  |
| Ion source                                                     | 240 $^{\circ}$ C                   |
| <b>Metadata pre-processing parameters</b>                      |                                    |
| Baseline offset                                                | 0.5                                |
| Peak Width                                                     | 15                                 |
| Match Required to combine (2D)                                 | 600                                |
| Peak width (2D)                                                | 15                                 |
| Minimum signal/noise (S/N)                                     | 25                                 |
| Segmented Processing S/N                                       | 250                                |
| Number of hits to return                                       | 5                                  |
| Minimum mol Weight                                             | 45                                 |
| Maximum mol Weight                                             | 500                                |
| Mass Threshold                                                 | 10                                 |
| Minimum similarity match                                       | 600                                |
| <b>Stat Compare options</b>                                    |                                    |
| ChromaTof version                                              | V4.50                              |
| Minimum similarity match                                       | 700                                |
| Maximum modulation periods apart                               | 1                                  |
| Maximum RT difference (s)                                      | 0.1                                |
| Minimum number of samples that contain the analyte             | 5                                  |
| Minimum percent of samples in a class that contain the analyte | 50                                 |

**Table S3.** Amino acids' single ion monitoring for mass spectrometry detector.

| <b>Amino Acid Name</b> | <b>Single Ion Monitoring*</b> | <b>Amino Acid Name</b> | <b>Single Ion Monitoring*</b> | <b>Amino Acid Name</b> | <b>Single Ion Monitoring*</b> |
|------------------------|-------------------------------|------------------------|-------------------------------|------------------------|-------------------------------|
| L-Alanine              | 260.19                        | L-Histidine            | 326.3                         | L-Proline              | 286.2                         |
| L-Arginine             | 345.3                         | L-Isoleucine           | 302.3                         | L-Serine               | 276.2                         |
| L-Aspartic Acid        | 304.2                         | L-Leucine              | 302.3                         | Taurine                | 296.2                         |
| L-Cysteic Acid         | 340.3                         | L-Lysine               | 317.3                         | L-Threonine            | 290.2                         |
| L-Cystine              | 411.4                         | L-Methionine           | 320.3                         | L-Tryptophan           | 375.3                         |
| L-Glutamic Acid        | 318.2                         | L-Norleucine           | 302.3                         | L-Tyrosine             | 352.3                         |
| Glycine                | 246.17                        | L-Phenylalanine        | 336.3                         | L-Valine               | 288.3                         |

\*Total mass of amino acid and derivatising agent (molecular weight = 171.10)

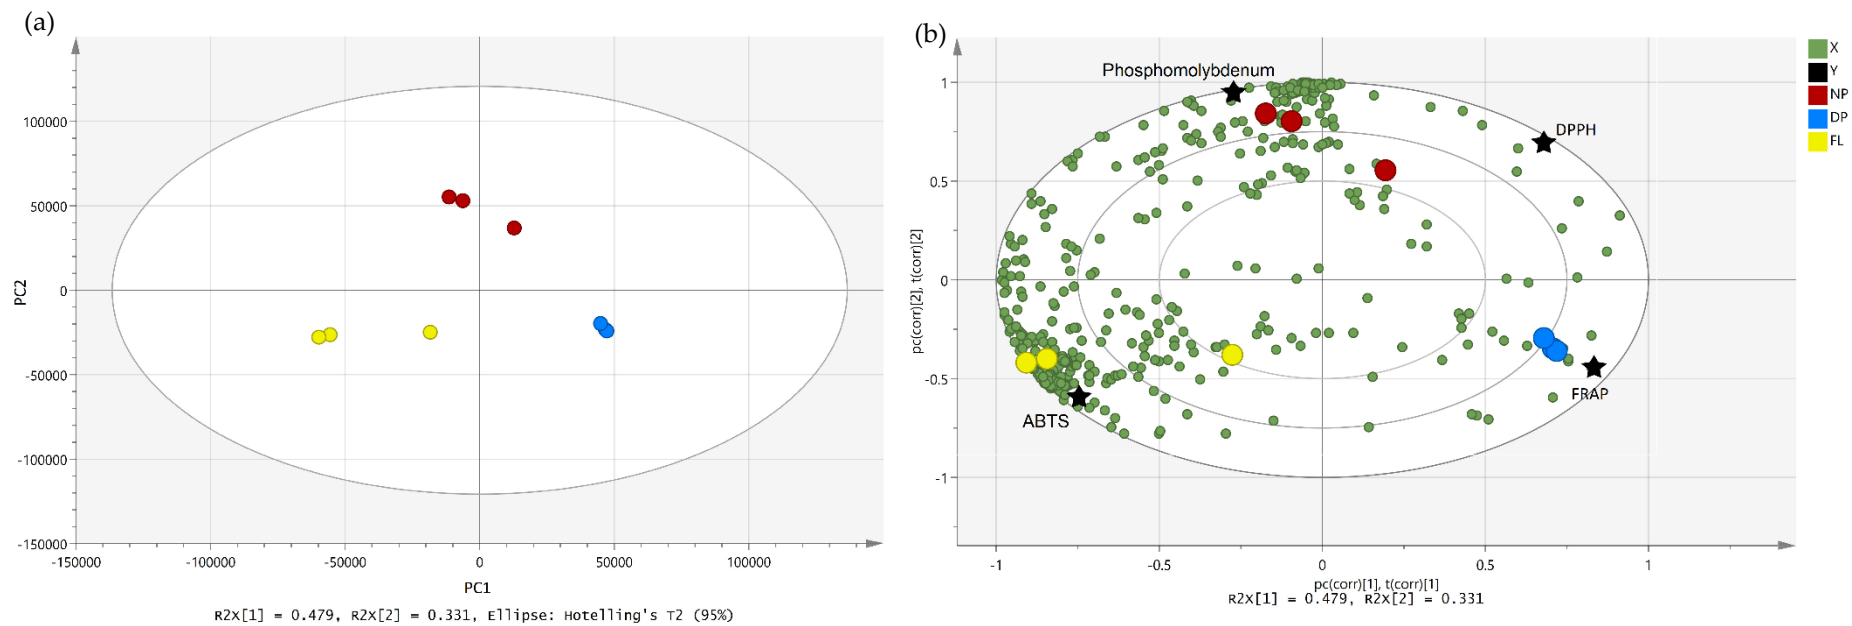

**Figure S1.** (a) Partial least square (PLS) score plot based on GC x GX-TOFMS data. (b) PLS biplot plots showing correlation between identified aroma compounds with antioxidant activity. X=compounds, Y=antioxidant activity.

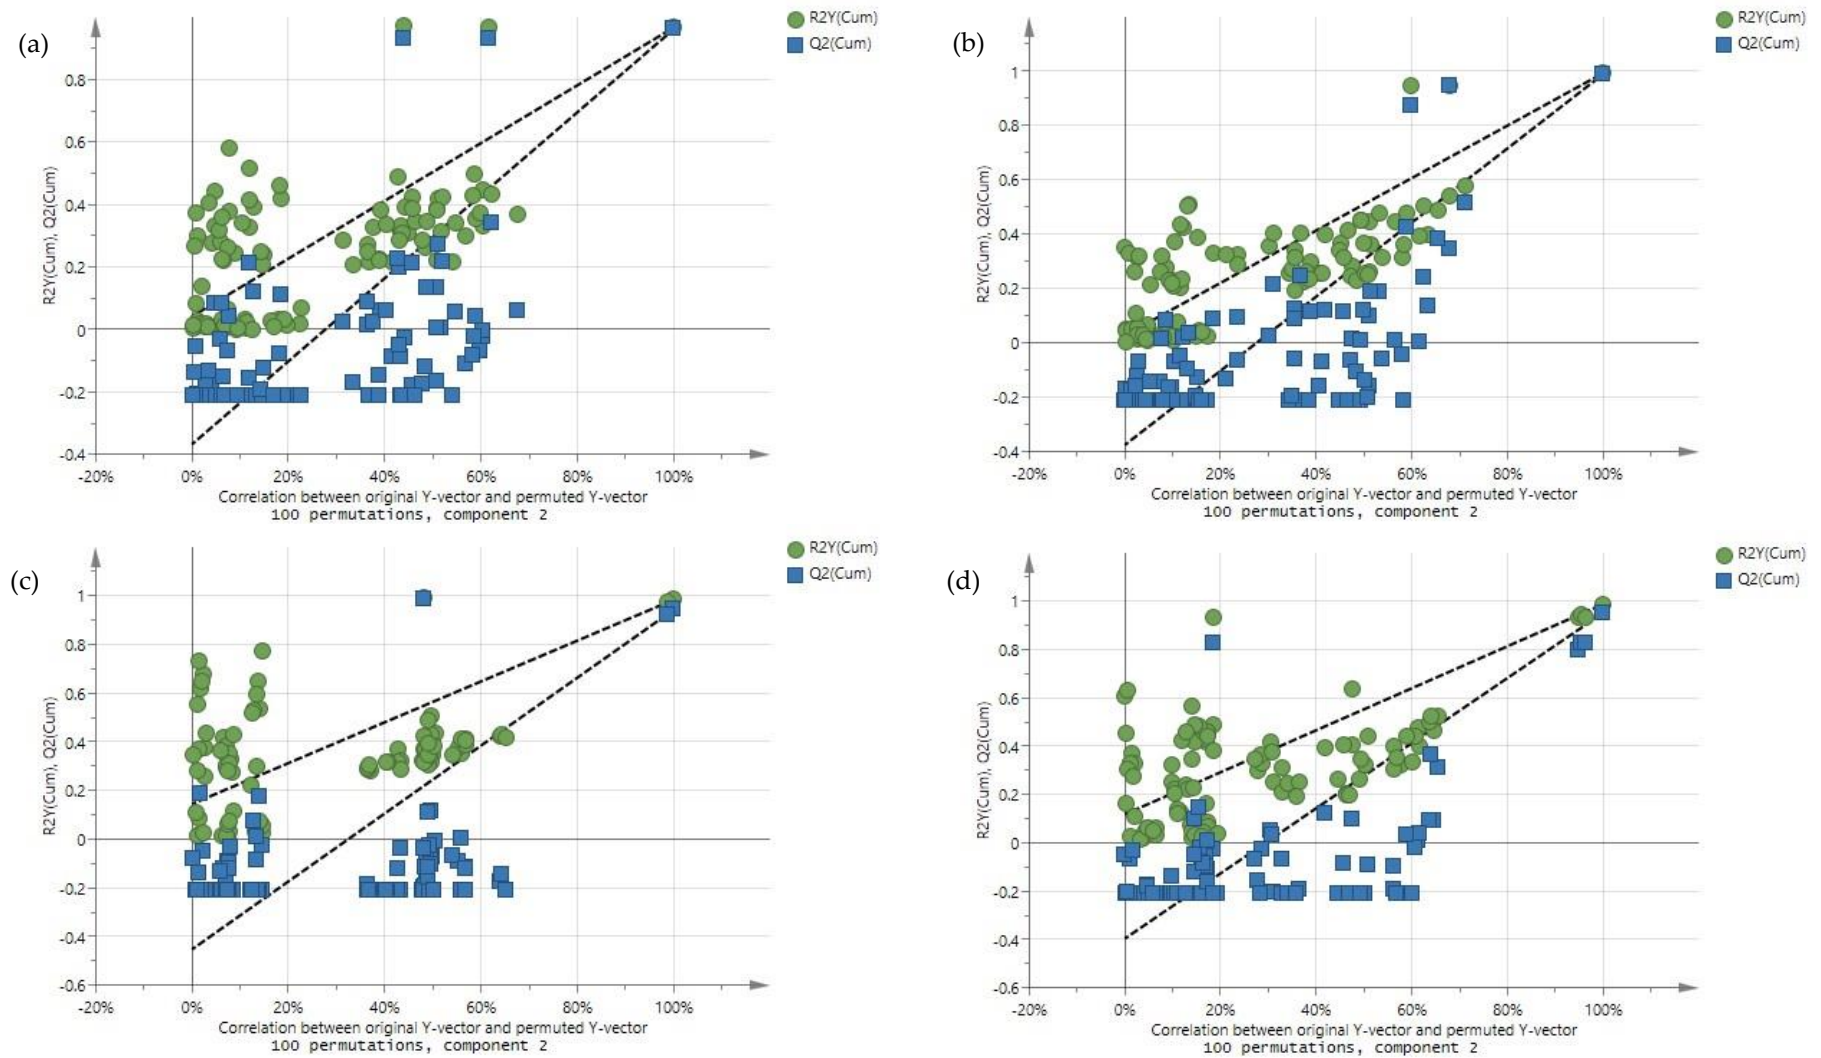

**Figure S2.** Permutation test of the PLS model based on UHPLC-QqQ-TOF-MS/MS data (a) ABTS; (b) DPPH; (c) FRAP; (d) Phosphomolybdenum assays

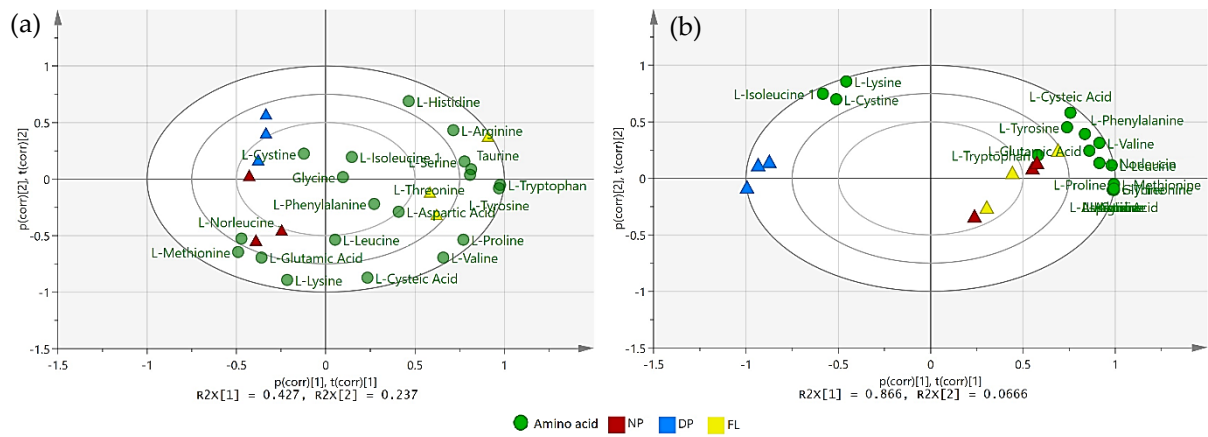

**Figure S3.** Biplot association of (a) free amino acid; (b) hydrolysed protein amino acid in Davidson's plum (DP), finger lime (FL) and native pepperberry (NP).

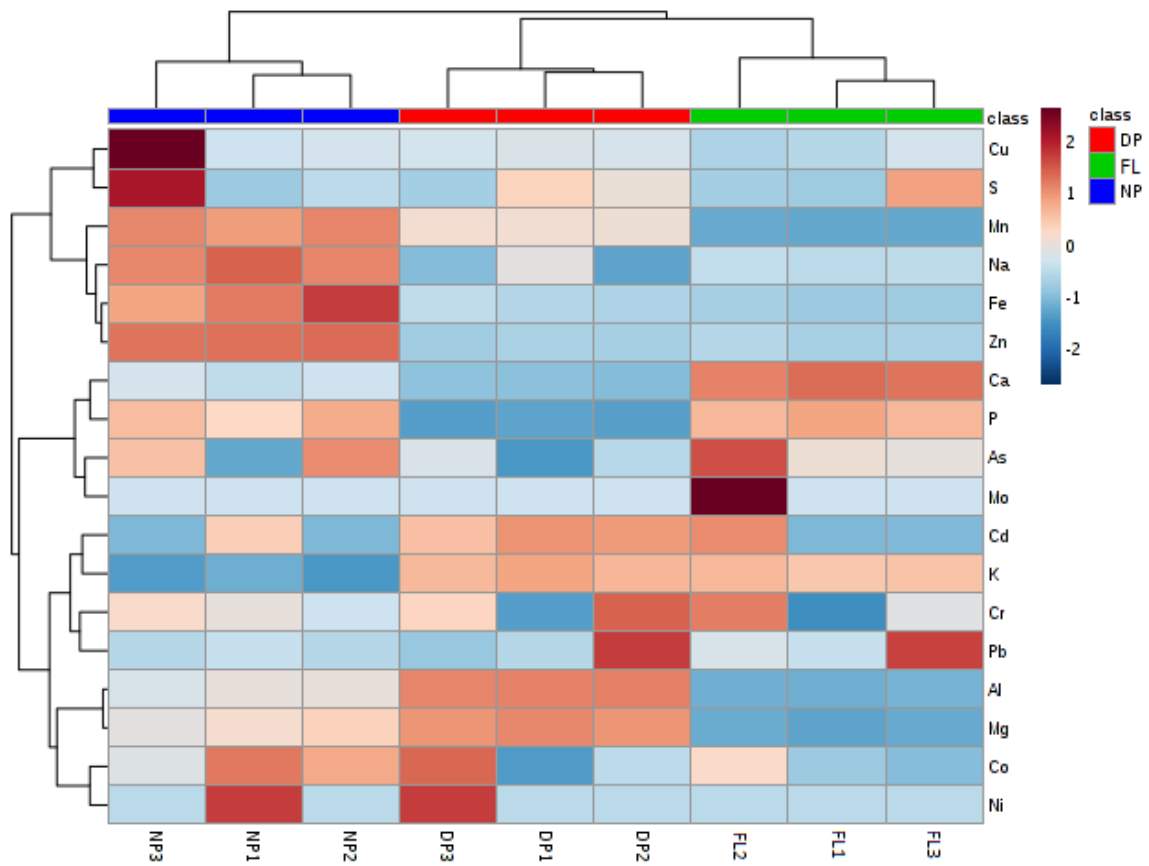

**Figure S4.** Heat map of 18 mineral nutrients and heavy metals found in the fruit samples.
